# THE JOURNAL OF NEUROPSYCHIATRY and Clinical Neurosciences

The Official Journal of the American Neuropsychiatric Association

## In this issue:

- Latent *Toxoplasmosis gondii*:  
Emerging Evidence for Influences  
on Neuropsychiatric Disorders
- The Three-Dimensional  
Approach to Neuropsychiatric  
Assessment
- Psychiatric Disorders After  
Pediatric Traumatic Brain Injury
- Repetitive Transcranial  
Magnetic Stimulation in  
Obsessive-Compulsive Disorder
- EEG Screening for Temporal  
Lobe Epilepsy in Patients  
With Acute Psychosis

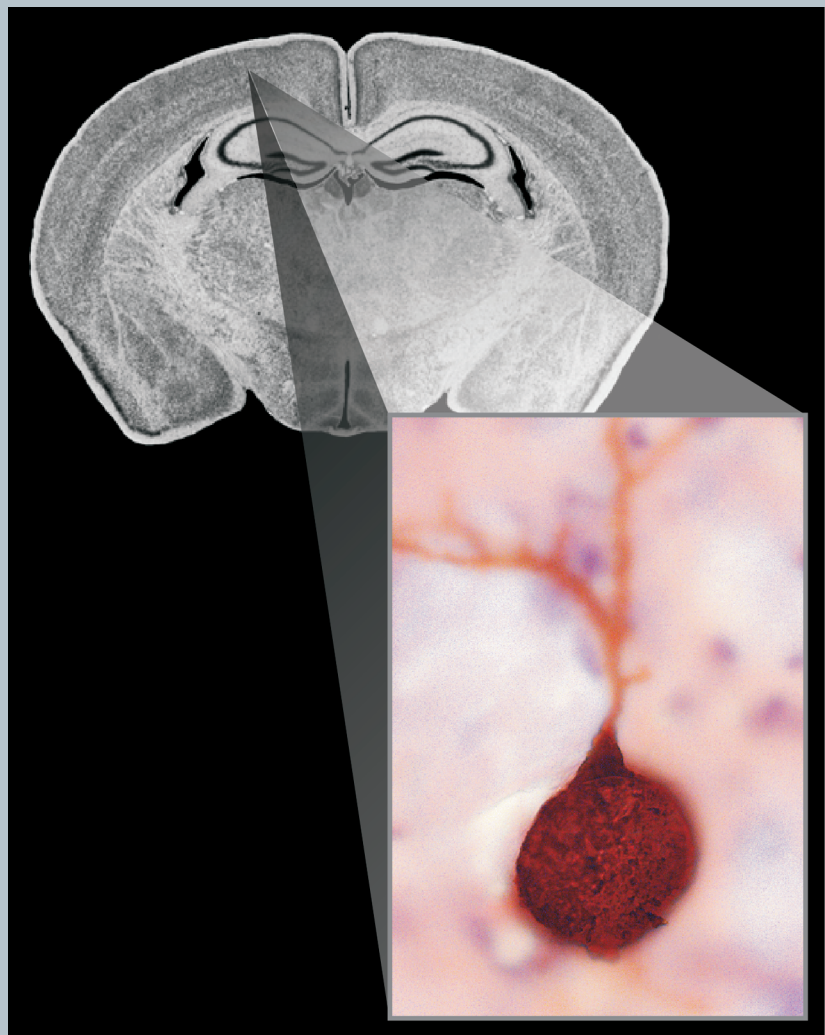

Source: https://psychiatryonline.org/doi/suppl/10.1176/jnp.2012.24.issue-4/suppl_file/cover.pdf
