# New Titles in Psychiatry

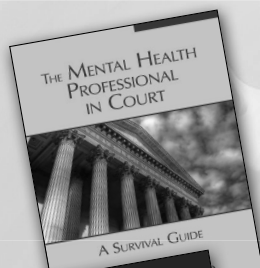

**The Mental Health Professional in Court**  
A Survival Guide

**Thomas G. Gutheil, M.D., and Eric Y. Drogin, J.D., Ph.D.**

2013 · 144 pages · ISBN 978-1-58562-438-6 · Paperback · \$59.00 · Item #62438

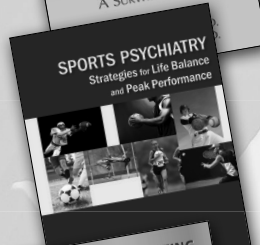

**Sports Psychiatry**

Strategies for Life Balance and Peak Performance

**David R. McDuff, M.D.**

Foreword by Ozzie Newsome

2012 · 288 pages · ISBN 978-1-58562-415-7 · Paperback · \$59.00 · Item #62415

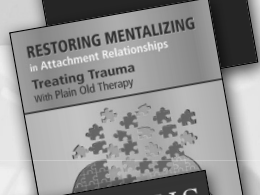

**Restoring Mentalizing in Attachment Relationships**

Treating Trauma With Plain Old Therapy

**Jon G. Allen, Ph.D.**

Foreword by Peter Fonagy, Ph.D., F.B.A.

2013 · 325 pages · ISBN 978-1-58562-418-8 · Paperback · \$65.00 · Item #62418

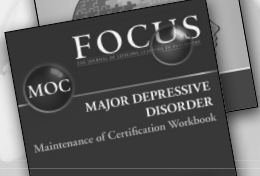

**FOCUS Major Depressive Disorder Maintenance of Certification (MOC) Workbook**

Edited by Deborah J. Hales, M.D., Mark Hyman Rapaport, M.D., and Kristen Moeller

2013 · 208 pages · ISBN 978-0-89042-460-5 · Paperback · \$85.00 · Item #2460

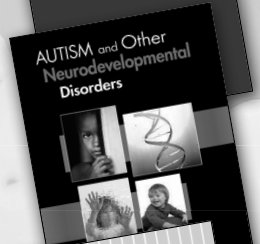

**Autism and Other Neurodevelopmental Disorders**

Edited by Robin L. Hansen, M.D., and Sally J. Rogers, Ph.D.

2013 · 336 pages · ISBN 978-1-58562-425-6 · Paperback · \$65.00 · Item #62425

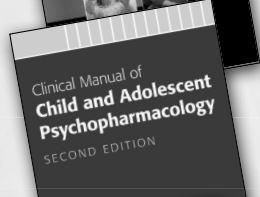

**Clinical Manual of Child and Adolescent Psychopharmacology, Second Edition**

Edited by Molly McVoy, M.D., and Robert L. Findling, M.D., M.B.A.

2013 · 496 pages · ISBN 978-1-58562-435-5 · Paperback · \$79.00 · Item #62435

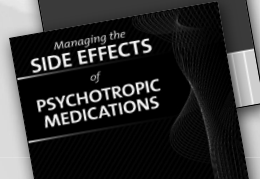

**Managing the Side Effects of Psychotropic Medications**

Joseph F. Goldberg, M.D., M.S., and Carrie L. Ernst, M.D.

Foreword by Stephen M. Stahl, M.D., Ph.D.

2012 · 532 pages · ISBN 978-1-58562-402-7 · Paperback · \$65.00 · Item #62402

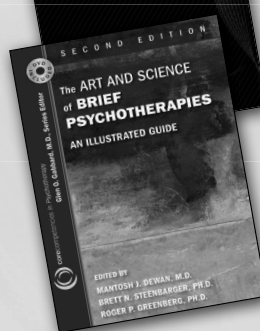

**The Art and Science of Brief Psychotherapies**

An Illustrated Guide, Second Edition

Core Competencies in Psychotherapy

Edited by Mantosh J. Dewan, M.D., Brett N. Steenbarger, Ph.D., and Roger P. Greenberg, Ph.D.

Series Editor: Glen O. Gabbard, M.D.

2012 · 372 pages · ISBN 978-1-58562-396-9 · Paperback · \$79.00 · Item #62396

# THE JOURNAL OF NEUROPSYCHIATRY and Clinical Neurosciences

The Official Journal of the American Neuropsychiatric Association

**Stuart C. Yudofsky, M.D.**  
*Editor*

**Robert E. Hales, M.D., M.B.A.**  
*Deputy Editor*

**Claudia Burns, M.A., L.P.C.**  
**Andrea Lynn Sanders, A.A.S.**  
*Assistants to the Editors*

#### **Consulting Editors**

Floyd Bloom, M.D.  
Edward G. Jones, M.D., Ph.D.  
Eric R. Kandel, M.D.  
Henry Nasrallah, M.D.  
Solomon H. Snyder, M.D.

#### **Associate Editors**

Nancy C. Andreasen, M.D., Ph.D.  
David B. Arciniegas, M.D.  
Nashaat N. Boutros, M.D.  
C. Edward Coffey, M.D.  
Joseph T. Coyle, M.D.  
Jeffrey L. Cummings, M.D.  
Michael Ebert, M.D.  
Dwight L. Evans, M.D.  
Robert C. Green, M.D.  
Edward C. Lauterbach, M.D.  
Thomas W. McAllister, M.D.  
John M. Morihisa, M.D.

Charles Nemeroff, M.D., Ph.D.  
Thomas C. Neylan, M.D.  
Trevor R. P. Price, M.D.  
Robert G. Robinson, M.D.  
Stephen Salloway, M.D., M.S.  
Randolph B. Schiffer, M.D.  
Jonathan M. Silver, M.D.  
Robert Stern, Ph.D.  
Paula T. Trzepacz, M.D.  
Daniel R. Weinberger, M.D.

#### **Neuropsychiatric Practice and Opinion Editor**

Fred Ovsiew, M.D.

#### **Neuropsychiatry Classics Editor**

Thomas C. Neylan, M.D.

#### **Book Review Editor**

Paula T. Trzepacz, M.D.

#### **Windows to the Brain Editors**

Robin A. Hurley, M.D.  
L. Anne Hayman, M.D.  
Katherine H. Taber, Ph.D.

#### **Research and Statistical Design Consultants**

Douglas Mossman, M.D.  
Eugene Somoza, M.D., Ph.D.

#### **American Psychiatric Publishing**

Rebecca D. Rinehart  
*Publisher*

Michael Roy  
*Editorial Director, Journals*

Elizabeth Stone  
*Senior Editor*

Y. Nicole Gray  
*Editorial Support Services Manager*

Robert Pursell  
*Associate Publisher for Advertising, Sales, and  
Marketing*

Trang Duong  
*Institutional Sales Manager*

Roger Domras  
*Director of Fulfillment and Circulation*

*The Journal of Neuropsychiatry and Clinical Neurosciences*, (ISSN 0895-0172), is published quarterly by the American Psychiatric Association (APA), 1000 Wilson Blvd., Suite 1825, Arlington, VA 22209. Copyright © 2012 American Psychiatric Association. *The Journal of Neuropsychiatry and Clinical Neurosciences* is protected by copyright and may not be reproduced in any manner without written permission. *The Journal of Neuropsychiatry and Clinical Neurosciences* is abstracted/indexed in *Chemical Abstracts*, *Current Contents/Clinical Medicine*<sup>®</sup>, *EMBASE/Excerpta Medica*, *Index Medicus/MEDLINE/MEDLARS*, *PsycINFO*, *Psychological Abstracts*, *Research Alert*<sup>®</sup>, and *Sci Search*<sup>®</sup>. It is available through University Microfilms, Inc., 300 North Zeeb Road, Ann Arbor, MI 48106, in microform, electronic, or paper format.

Manuscript submissions should no longer be sent by mail. Please visit <http://mc.manuscriptcentral.com> to upload a paper online.

U.S. subscriptions are \$218 per year (4 issues) individual; \$174 for APA members; international subscriptions are \$329 per year. APA Members receive 20% discount off regular individual subscription rate. Institutional Subscriptions are tier priced. For institutional site license information and pricing, please email us at [appi@psych.org](mailto:appi@psych.org), call (800) 368-5777 or visit [www.appi.org/ForLibrarians/](http://www.appi.org/ForLibrarians/). *The Journal of Neuropsychiatry and Clinical Neurosciences*, 1000 Wilson Blvd., Suite 1825, Arlington, VA 22209.

Advertising inquiries may be directed to PMI, 30 East 33rd St., New York, NY 10016; (212) 685-5010.

APA is not responsible for statements made in this publication by contributors or advertisers. Unless stated, material in *The Journal of Neuropsychiatry and Clinical Neurosciences* does not reflect the endorsement, official attitude, or position of APA or the American Neuropsychiatric Association.

Periodicals postage paid at Arlington, VA, and additional mailing offices. POSTMASTER: Send address changes to *The Journal of Neuropsychiatry and Clinical Neurosciences*, 1000 Wilson Blvd., Suite 1825, Arlington, VA 22209.

American  
**P**sychiatric  
Publishing

A Division of American Psychiatric Association

Please visit the Journal's web site at <http://neuro.psychiatryonline.org>
